# Supplementary material for: Techno-economic analysis of a solar-powered biomass electrolysis pathway for coproduction of hydrogen and value-added chemicals
Source: Royal Society of Chemistry journal article supplement (doi:10.1039/d0se01149e), 2020-01-01
Supplement: d0se01149e1.pdf [file d0se01149e1.pdf]

# Supporting Information

## **Techno-economic analysis of a solar-powered biomass electrolysis pathway for coproduction of hydrogen and value-added chemicals**

M.A. Khan<sup>a\*</sup>, Tareq A. Al-Attas<sup>a\*</sup>, Nael G Yasri,<sup>a</sup> Heng Zhao,<sup>a</sup> Stephen Larter<sup>b</sup>, Jinguang Hu<sup>a+</sup> and Md Golam Kibria<sup>a+</sup>

\*Equal contribution

<sup>a</sup>Department of Chemical and Petroleum Engineering, University of Calgary, 2500 University Drive, NW, Calgary, Alberta T2N 1N4, Canada.

<sup>b</sup>Department of Geosciences, University of Calgary, 2500 University Drive, NW, Calgary, Alberta T2N 1N4, Canada.

<sup>+</sup>Correspondence: [jinguang.hu@ucalgary.ca](mailto:jinguang.hu@ucalgary.ca) ; [md.kibria@ucalgary.ca](mailto:md.kibria@ucalgary.ca)

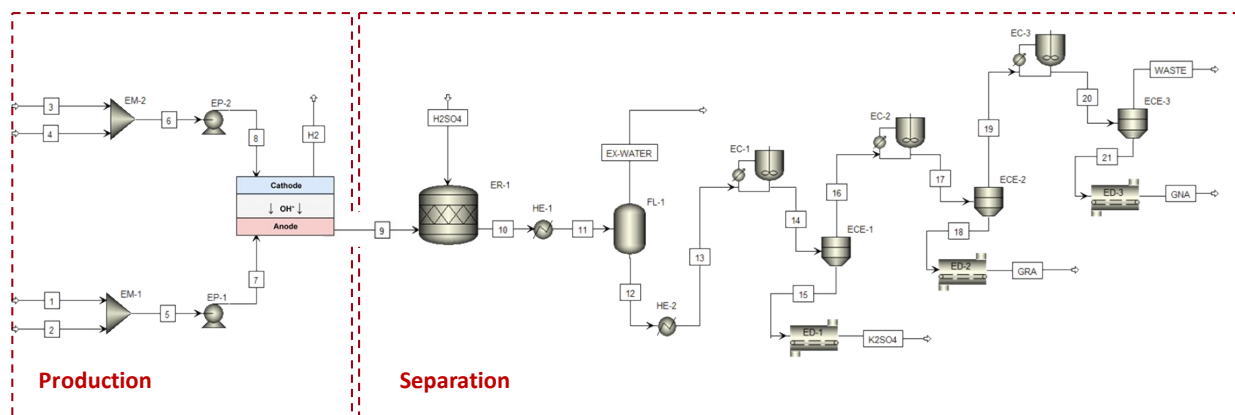

**Figure S1.** Process flow diagram of electrocatalytic oxidation of glucose to H<sub>2</sub> and chemicals (GRA, GNA and K<sub>2</sub>SO<sub>4</sub>).

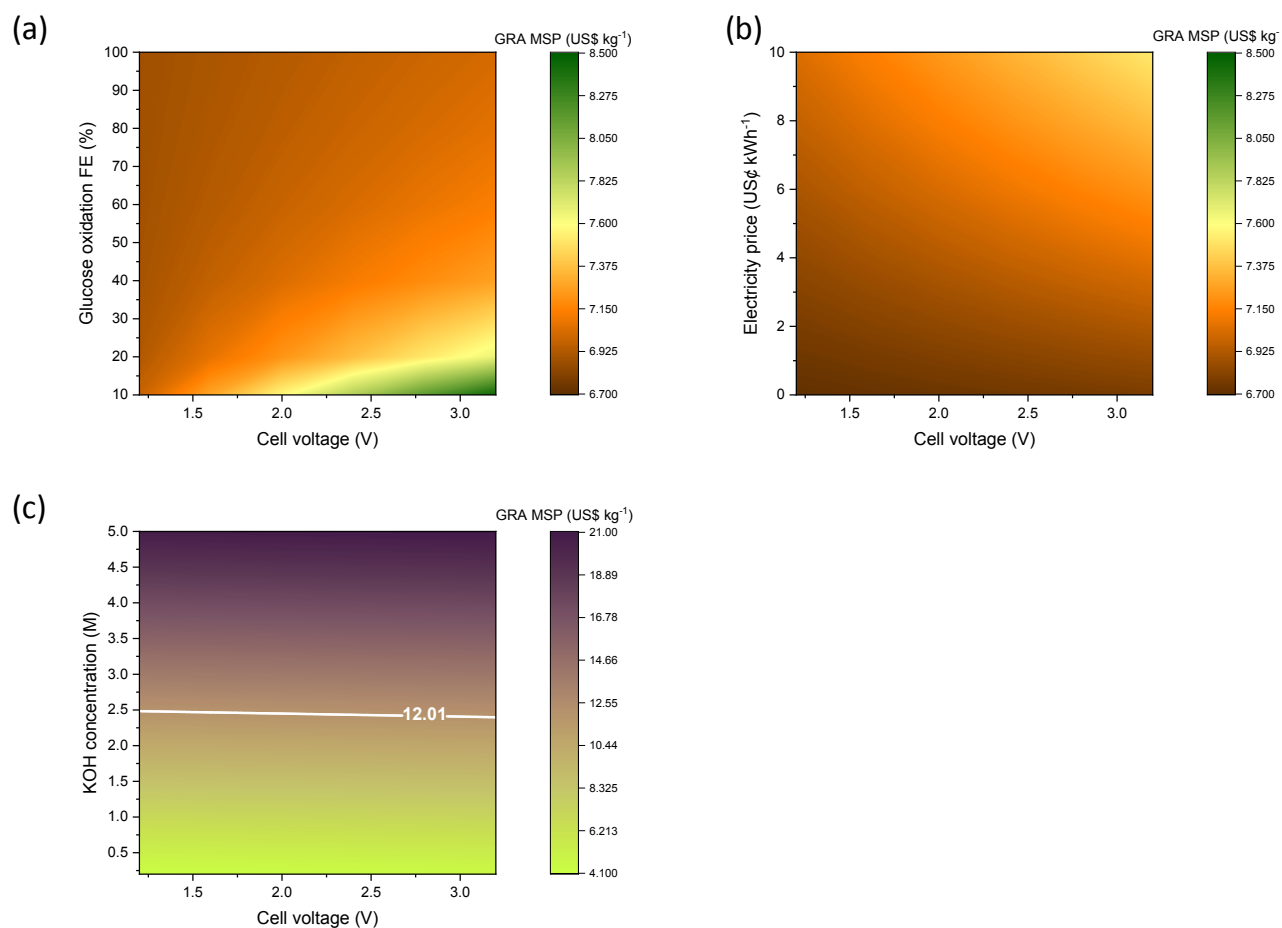

**Figure S2.** Electrolysis performance contour plots showing the dependence of MSP of GRA on GRA selectivity, glucose conversion, operating current density and cell voltage. The solid white line depicts the current market price of GRA at ~ US\$12 kg<sup>-1</sup>.

**Table S1.** Base case results for the system analysed.

|                                |                             |          |
|--------------------------------|-----------------------------|----------|
|                                | <b>CAPEX distribution</b>   |          |
| Electrolyzer                   | US\$3,769,059.56            | 9.42 %   |
| Other equipment                | US\$19,749,600.00           | 49.36 %  |
| PV capital                     | US\$3,739,242.31            | 9.35 %   |
| Indirect costs                 | US\$1,646,306.17            | 4.11 %   |
| Contingency                    | US\$5,780,841.61            | 14.45 %  |
| Land                           | US\$123,497.00              | 0.31 %   |
| Working capital                | US\$5,202,757.45            | 13.00 %  |
|                                |                             |          |
| <b>Total capital</b>           | US\$40,011,304.08           | 100.00 % |
|                                |                             |          |
|                                | <b>OPEX distribution</b>    |          |
| Raw material                   | US\$118,893,333.33          | 81.97 %  |
| Electrolyzer OPEX              | US\$1,185,605.93            | 0.82 %   |
| Electricity for separation     | US\$245,412.96              | 0.17 %   |
| Steam                          | US\$22,494,750.18           | 15.51 %  |
| Cooling water                  | US\$11,224.91               | 0.01 %   |
| Staff/labour                   | US\$2,100,000.00            | 1.45 %   |
| PV O&M                         | US\$107,078.30              | 0.07 %   |
|                                |                             |          |
| <b>Total OPEX</b>              | US\$145,037,405.60          | 100.00 % |
|                                |                             |          |
|                                | <b>Revenue distribution</b> |          |
| GNA                            | US\$14,000,000.00           | 9.24 %   |
| H <sub>2</sub>                 | US\$1,382,400.00            | 0.91 %   |
| K <sub>2</sub> SO <sub>4</sub> | US\$6,285,714.29            | 43.74 %  |
| O <sub>2</sub>                 | US\$304,761.90              | 0.20 %   |
| CO <sub>2</sub>                | US\$105,600.00              | 0.07 %   |
| GRA                            | US\$69,456,036.94           | 45.84 %  |
|                                |                             |          |
| <b>Total revenue</b>           | US\$151,534,513.13          | 100.00 % |

**Table S2.** Optimistic case results for the system analysed.

|                                |                             |          |
|--------------------------------|-----------------------------|----------|
|                                | <b>CAPEX distribution</b>   |          |
| Electrolyzer                   | US\$1,168,577.67            | 3.57 %   |
| Other equip                    | US\$19,005,500.00           | 58.07 %  |
| PV capital                     | US\$2,040,469.63            | 6.23 %   |
| Indirect costs                 | US\$1,412,185.44            | 4.31 %   |
| Contingency                    | US\$4,725,346.55            | 14.44 %  |
| Land                           | US\$73,497.00               | 0.38 %   |
| working capital                | US\$4,252,811.89            | 12.99 %  |
|                                |                             |          |
| <b>Total capital</b>           | US\$32,728,388.17           | 100.00 % |
|                                |                             |          |
|                                | <b>OPEX distribution</b>    |          |
| Raw material                   | US\$11,097,824.81           | 71.85 %  |
| Electrolyzer OPEX              | US\$537,635.35              | 3.48 %   |
| Electricity for separation     | US\$245,137.49              | 1.59 %   |
| Steam                          | US\$1,397,098.50            | 9.05 %   |
| Cooling water                  | US\$9,397.80                | 0.06 %   |
| Staff/labour                   | US\$2,100,000.00            | 13.60 %  |
| PV O&M                         | US\$58,431.63               | 0.38 %   |
|                                |                             |          |
| <b>Total OPEX</b>              | US\$15,445,525.58           | 100.00 % |
|                                |                             |          |
|                                | <b>revenue distribution</b> |          |
| GNA                            | US\$1,555,555.56            | 7.51 %   |
| H <sub>2</sub>                 | US\$597,333.33              | 2.89 %   |
| K <sub>2</sub> SO <sub>4</sub> | US\$4,091,710.76            | 19.76 %  |
| O <sub>2</sub>                 | US\$26,337.45               | 0.13%    |
| CO <sub>2</sub>                | US\$82,133.33               | 0.40%    |
| GRA                            | US\$14,349,459.21           | 69.31%   |
|                                |                             |          |
| <b>Total revenue</b>           | US\$20,702,529.63           | 100.00%  |

**Table S3.** Discounted cash flow analysis for the base case.

| Operation | Year | Investment (US\$) | Revenue (US\$)   | Cost (US\$)      | <sup>a</sup> Depreciation (US\$) | Profit before tax (PBT) (US\$) | Taxes paid (on PBT) (US\$) | Net profit after-tax (US\$) | Cash flow (US\$) | Discounted Cash Flow (US\$) | Cumulative DCF (US\$) |
|-----------|------|-------------------|------------------|------------------|----------------------------------|--------------------------------|----------------------------|-----------------------------|------------------|-----------------------------|-----------------------|
| -2        | 0    | -\$123,497.00     |                  |                  |                                  |                                |                            |                             | -\$123,497.00    | -\$123,497.00               | -\$123,497.00         |
| -1        | 1    | -\$17,342,524.82  |                  |                  |                                  |                                |                            |                             | -\$17,342,524.82 | -\$15,765,931.65            | -\$15,889,428.65      |
| 0         | 2    | -\$22,545,282.26  |                  |                  |                                  |                                |                            |                             | -\$22,545,282.26 | -\$18,632,464.68            | -\$34,521,893.34      |
| 1         | 3    |                   | \$151,534,513.13 | \$145,037,405.60 | \$3,121,654.47                   | \$3,375,453.06                 | \$1,313,051.24             | \$2,062,401.82              | \$5,184,056.29   | \$3,894,858.22              | -\$30,627,035.12      |
| 2         | 4    |                   | \$151,534,513.13 | \$145,037,405.60 | \$3,121,654.47                   | \$3,375,453.06                 | \$1,313,051.24             | \$2,062,401.82              | \$5,184,056.29   | \$3,540,780.20              | -\$27,086,254.92      |
| 3         | 5    |                   | \$151,534,513.13 | \$145,037,405.60 | \$3,121,654.47                   | \$3,375,453.06                 | \$1,313,051.24             | \$2,062,401.82              | \$5,184,056.29   | \$3,218,891.09              | -\$23,867,363.83      |
| 4         | 6    |                   | \$151,534,513.13 | \$145,037,405.60 | \$3,121,654.47                   | \$3,375,453.06                 | \$1,313,051.24             | \$2,062,401.82              | \$5,184,056.29   | \$2,926,264.63              | -\$20,941,099.21      |
| 5         | 7    |                   | \$151,534,513.13 | \$145,037,405.60 | \$3,121,654.47                   | \$3,375,453.06                 | \$1,313,051.24             | \$2,062,401.82              | \$5,184,056.29   | \$2,660,240.57              | -\$18,280,858.64      |
| 6         | 8    |                   | \$151,534,513.13 | \$145,037,405.60 | \$3,121,654.47                   | \$3,375,453.06                 | \$1,313,051.24             | \$2,062,401.82              | \$5,184,056.29   | \$2,418,400.52              | -\$15,862,458.12      |
| 7         | 9    |                   | \$151,534,513.13 | \$145,037,405.60 | \$3,121,654.47                   | \$3,375,453.06                 | \$1,313,051.24             | \$2,062,401.82              | \$5,184,056.29   | \$2,198,545.92              | -\$13,663,912.20      |
| 8         | 10   |                   | \$151,534,513.13 | \$145,037,405.60 | \$3,121,654.47                   | \$3,375,453.06                 | \$1,313,051.24             | \$2,062,401.82              | \$5,184,056.29   | \$1,998,678.11              | -\$11,665,234.08      |
| 9         | 11   |                   | \$151,534,513.13 | \$145,037,405.60 | \$3,121,654.47                   | \$3,375,453.06                 | \$1,313,051.24             | \$2,062,401.82              | \$5,184,056.29   | \$1,816,980.10              | -\$9,848,253.98       |
| 10        | 12   |                   | \$151,534,513.13 | \$145,037,405.60 | \$3,121,654.47                   | \$3,375,453.06                 | \$1,313,051.24             | \$2,062,401.82              | \$5,184,056.29   | \$1,651,800.09              | -\$8,196,453.89       |
| 11        | 13   |                   | \$151,534,513.13 | \$145,037,405.60 |                                  | \$6,497,107.53                 | \$2,527,374.83             | \$3,969,732.70              | \$3,969,732.70   | \$1,149,890.16              | -\$7,046,563.73       |
| 12        | 14   |                   | \$151,534,513.13 | \$145,037,405.60 |                                  | \$6,497,107.53                 | \$2,527,374.83             | \$3,969,732.70              | \$3,969,732.70   | \$1,045,354.69              | -\$6,001,209.04       |
| 13        | 15   |                   | \$151,534,513.13 | \$145,037,405.60 |                                  | \$6,497,107.53                 | \$2,527,374.83             | \$3,969,732.70              | \$3,969,732.70   | \$950,322.45                | -\$5,050,886.59       |
| 14        | 16   |                   | \$151,534,513.13 | \$145,037,405.60 |                                  | \$6,497,107.53                 | \$2,527,374.83             | \$3,969,732.70              | \$3,969,732.70   | \$863,929.50                | -\$4,186,957.09       |
| 15        | 17   |                   | \$151,534,513.13 | \$145,037,405.60 |                                  | \$6,497,107.53                 | \$2,527,374.83             | \$3,969,732.70              | \$3,969,732.70   | \$785,390.45                | -\$3,401,566.64       |
| 16        | 18   |                   | \$151,534,513.13 | \$145,037,405.60 |                                  | \$6,497,107.53                 | \$2,527,374.83             | \$3,969,732.70              | \$3,969,732.70   | \$713,991.32                | -\$2,687,575.32       |
| 17        | 19   |                   | \$151,534,513.13 | \$145,037,405.60 |                                  | \$6,497,107.53                 | \$2,527,374.83             | \$3,969,732.70              | \$3,969,732.70   | \$649,083.02                | -\$2,038,492.31       |
| 18        | 20   |                   | \$151,534,513.13 | \$145,037,405.60 |                                  | \$6,497,107.53                 | \$2,527,374.83             | \$3,969,732.70              | \$3,969,732.70   | \$590,075.47                | -\$1,448,416.84       |
| 19        | 21   |                   | \$151,534,513.13 | \$145,037,405.60 |                                  | \$6,497,107.53                 | \$2,527,374.83             | \$3,969,732.70              | \$3,969,732.70   | \$536,432.25                | -\$911,984.59         |
| 20        | 22   | \$3,592,001.96    | \$151,534,513.13 | \$145,037,405.60 |                                  | \$6,497,107.53                 | \$2,527,374.83             | \$3,969,732.70              | \$7,561,734.66   | \$928,928.66                | <b>\$16,944.07</b>    |

<sup>a</sup> 10-year straight line depreciation method

**Table S4.** The calculation for single-pass product accumulation/concentration

|                                                                                   |                |
|-----------------------------------------------------------------------------------|----------------|
| Fixed current density (A/cm <sup>2</sup> )                                        | 0.20           |
| selectivity to glucose oxidation                                                  | 50%            |
| selectivity to GRA                                                                | 50%            |
| GRA partial current density (A/cm <sup>2</sup> or C/s/cm <sup>2</sup> )           | 0.05           |
| GNA partial current density (A/cm <sup>2</sup> or C/s/cm <sup>2</sup> )           | 0.05           |
| water (tons/year)                                                                 | 1904761.905    |
| Real electrolyte flow rate (tons/min)                                             | 3.78           |
| Total electrolyte flow rate (L/min)                                               | 3779.289494    |
| Area of electrolyser (cm <sup>2</sup> )                                           | 12140085.66    |
| Faradays constant (C/mole e <sup>-</sup> )                                        | 96480          |
|                                                                                   |                |
| convert coulombs to mole of electrons (mole e <sup>-</sup> /sec/cm <sup>2</sup> ) | 5.1824E-07     |
| convert mole of electrons to mole GRA (mole GRA/sec/cm <sup>2</sup> )             | 8.6374E-08     |
| convert to grams of GRA (grams GRA/sec/cm <sup>2</sup> )                          | 1.8151E-05     |
| convert to volume using density (mL/sec/cm <sup>2</sup> )                         | 9.5529E-06     |
| single pass GRA flux (mL/min/cm <sup>2</sup> )                                    | 5.7318E-04     |
| single-pass GRA volume flow rate (mL/min)                                         | 6958.403       |
|                                                                                   |                |
| convert coulombs to mole of electrons (mole e <sup>-</sup> /sec/cm <sup>2</sup> ) | 5.1824E-07     |
| convert mole of electrons to mole GNA (mole GRA/sec/cm <sup>2</sup> )             | 2.5912E-07     |
| convert to grams of GNA (grams GNA/sec/cm <sup>2</sup> )                          | 5.0829E-05     |
| convert to volume using density (mL/sec/cm <sup>2</sup> )                         | 4.1191E-05     |
| GNA flux (mL/min/cm <sup>2</sup> )                                                | 2.4714E-03     |
| GNA volume flow rate (mL/min)                                                     | 30003.437      |
|                                                                                   |                |
| total product volume flow rate (mL/min)                                           | 36961.840      |
| <b>product accumulation (%)</b>                                                   | <b>0.9780%</b> |

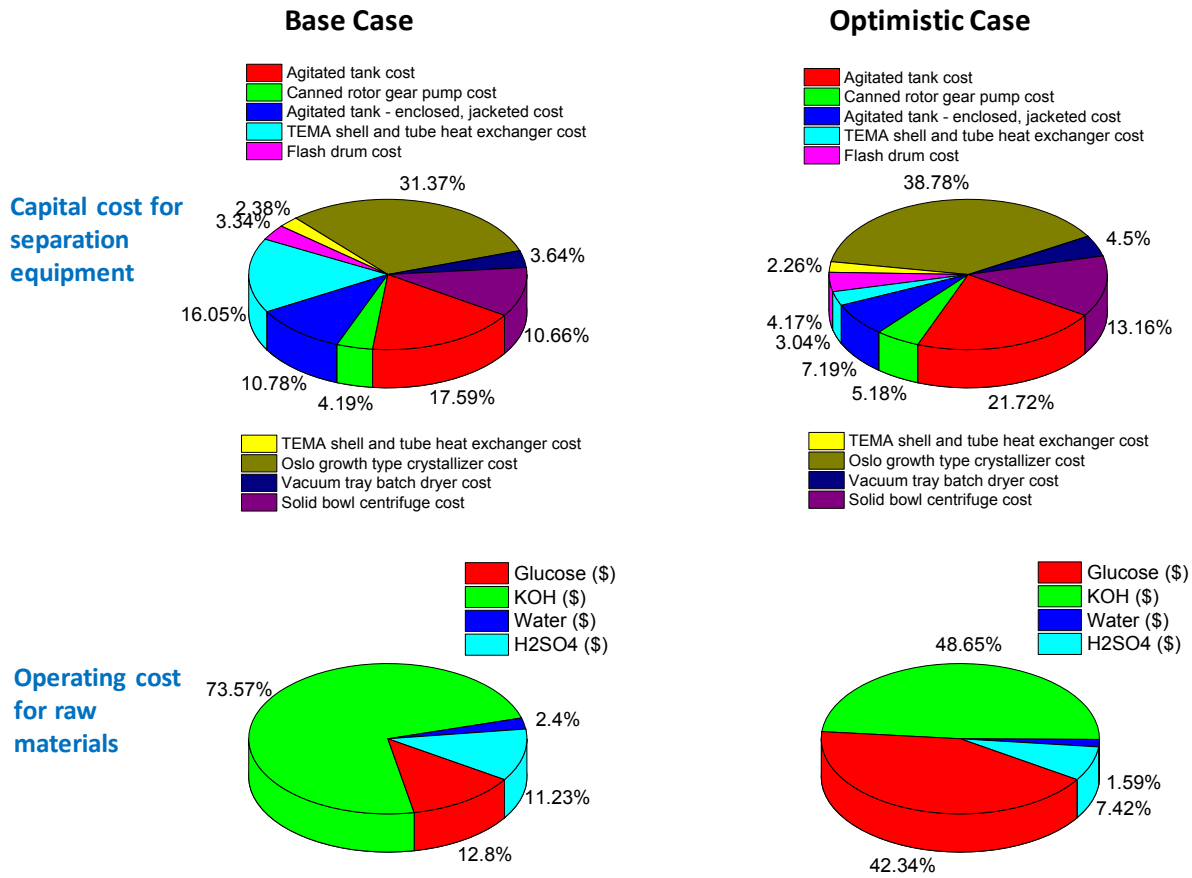

**Figure S3.** Breakdown of the capex for separation equipment and opex of raw material costs using base case and optimistic assumptions. Note: The neutralizer reactor is an agitated tank -enclosed, jacketed.
